# Supplementary material
Source: PubMed Central journal article supplement (PMC4646718)
Supplement: NIHMS722829-supplement-Supplemental_Figure_S1.pdf [file NIHMS722829-supplement-Supplemental_Figure_S1.pdf]

## ONLINE SUPPLEMENT

### **LTB<sub>4</sub> activates pulmonary artery adventitial fibroblasts in pulmonary hypertension.**

**Authors:** Jin Qian<sup>1,2,†</sup>, Wen Tian<sup>1,2,†</sup>, Xinguo Jiang<sup>1,2</sup>, Rasa Tamosiuniene<sup>1,2</sup>, Yon K. Sung<sup>1,2</sup>, Eric M. Shuffle<sup>1,2</sup>, Allen B. Tu<sup>1,2</sup>, Antonia Valenzuela<sup>2</sup>, Shirley Jiang<sup>2</sup>, Roham T. Zamanian<sup>2</sup>, David F. Fiorentino<sup>2</sup>, Norbert F. Voelkel<sup>3</sup>, Marc Peters-Golden<sup>4</sup>, Kurt R. Stenmark<sup>5</sup>, Lorinda Chung<sup>2</sup>, Marlene Rabinovitch<sup>2</sup>, Mark R. Nicolls<sup>1,2,\*</sup>

#### **Affiliations:**

<sup>1</sup> VA Palo Alto Health Care System, Palo Alto, CA 94304

<sup>2</sup> Stanford University, School of Medicine, Stanford, CA 94305

<sup>3</sup> Virginia Commonwealth University, Richmond, VA 23284

<sup>4</sup> University of Michigan Health Systems, Ann Arbor, MI 48109

<sup>5</sup> University of Colorado Denver, School of Medicine, Aurora, CO 80045

**†Contributed equally to manuscript**

**\*Corresponding Author:**

Mark R. Nicolls, MD

VA Palo Alto Health Care System; Stanford University School of Medicine

Med111P

3801 Miranda Ave.

Palo Alto, CA 94304

Office: (650) 493-5000 x69289

Fax: (650) 849-0553

[mnicolls@stanford.edu](mailto:mnicolls@stanford.edu)

ONLINE SUPPLEMENT

Supplemental Figure

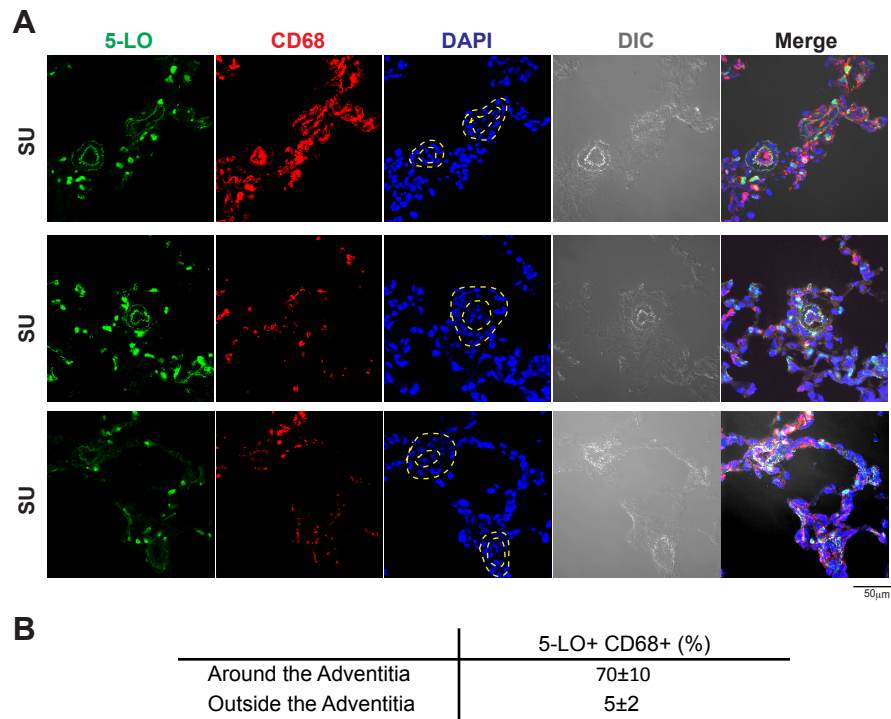

**Figure S1.** 5-LO positive macrophages are concentrated around the adventitial compartment.

A, Representative immunofluorescence images of lung sections stained with 5-LO (green) and CD68 (red) from SU treated animals.

B, 5-LO+ and CD68+ double positive cells were counted and grouped as cell around the adventitia or cells outside of the adventitia. n= 5; DAPI (blue) stains nuclei. Data are expressed as means ± SEM.

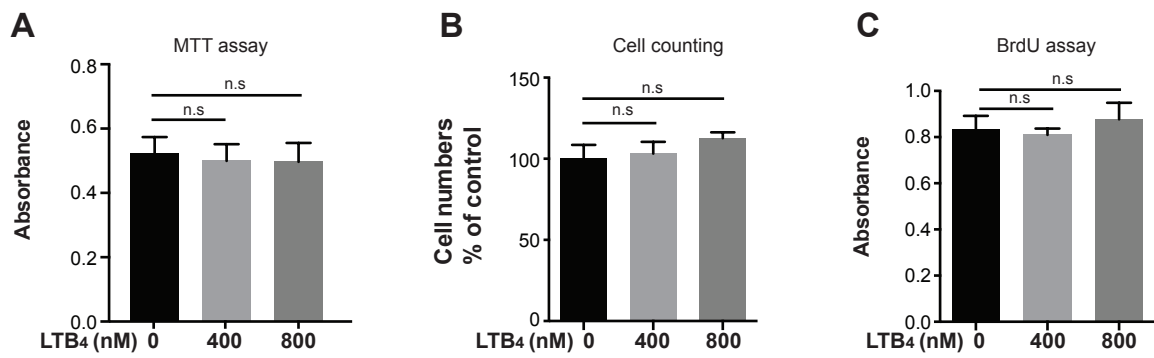

**Figure S2.** LTB<sub>4</sub> has no effect on proliferation in human lung fibroblasts (HLF). HLF were treated with LTB<sub>4</sub> for 72hrs. Proliferation of HLF was measured by A. MTT assay, B, cell counting, C, BrdU assay. Data are presented as mean ± SEM. (n.s = non-significant) The experiments were repeated three times.

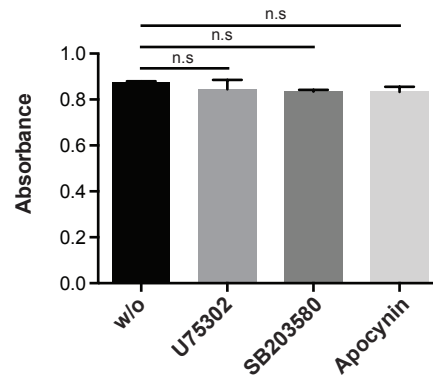

**Figure S3.** Inhibitors have no toxicity on HPAAF. MTT assay were performed after 72 hrs with treatment of U75302 (1 $\mu$ M), SB203580 (10 $\mu$ M) or apocynin (300 $\mu$ M) in HPAAF. Data are presented as mean  $\pm$  SEM. (n.s = non-significant) The experiments were repeated three times.

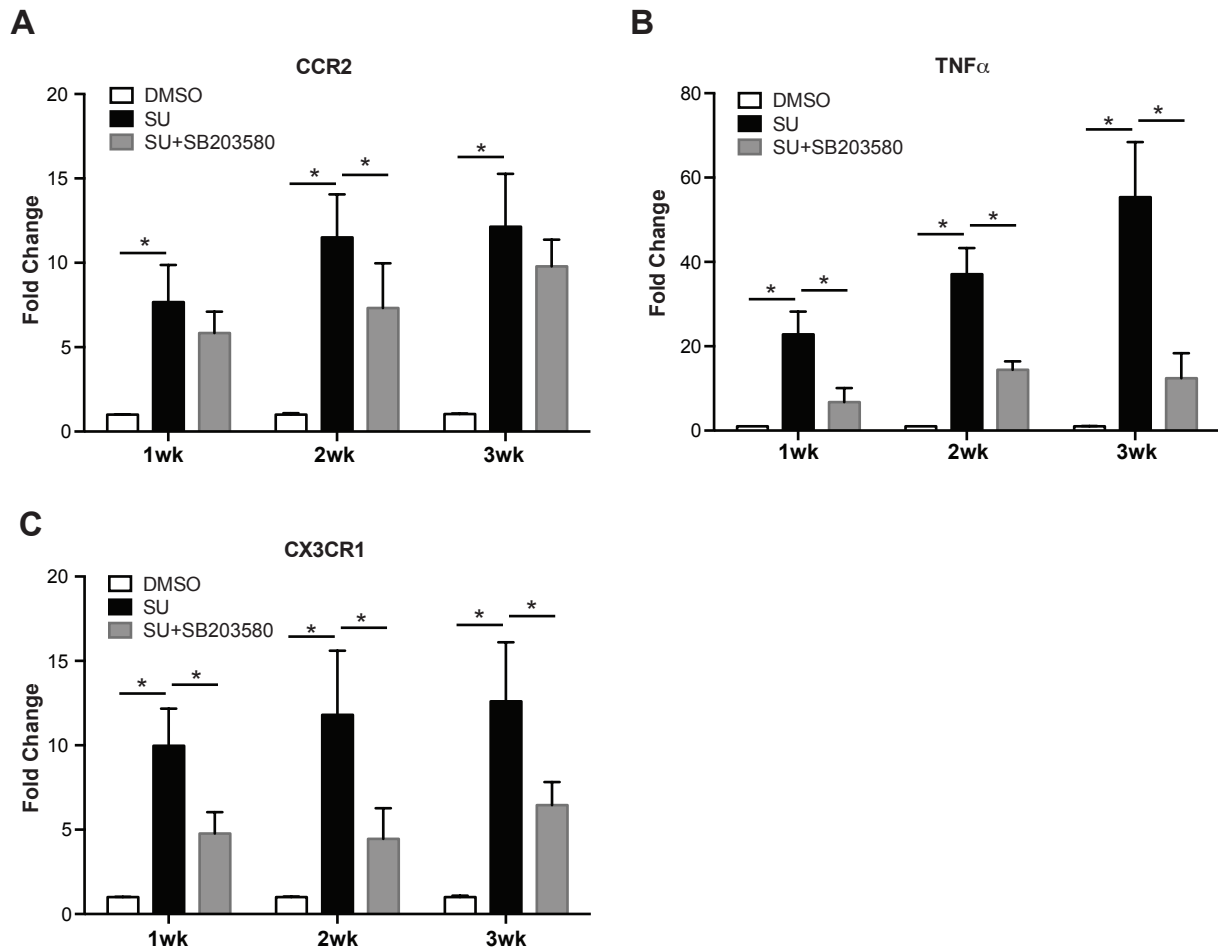

**Figure S4.** p38 MAPK inhibition treatment with SB203580 reduces lung inflammation in experimental PH. The macrophage-associated cytokine TNF- $\alpha$  and chemokines, CXCR1 and CCR2 in PH were evaluated by RT-PCR of lung tissues (n=3 experiments per group). Data are expressed as means  $\pm$  SEM. (\*: p<0.05)

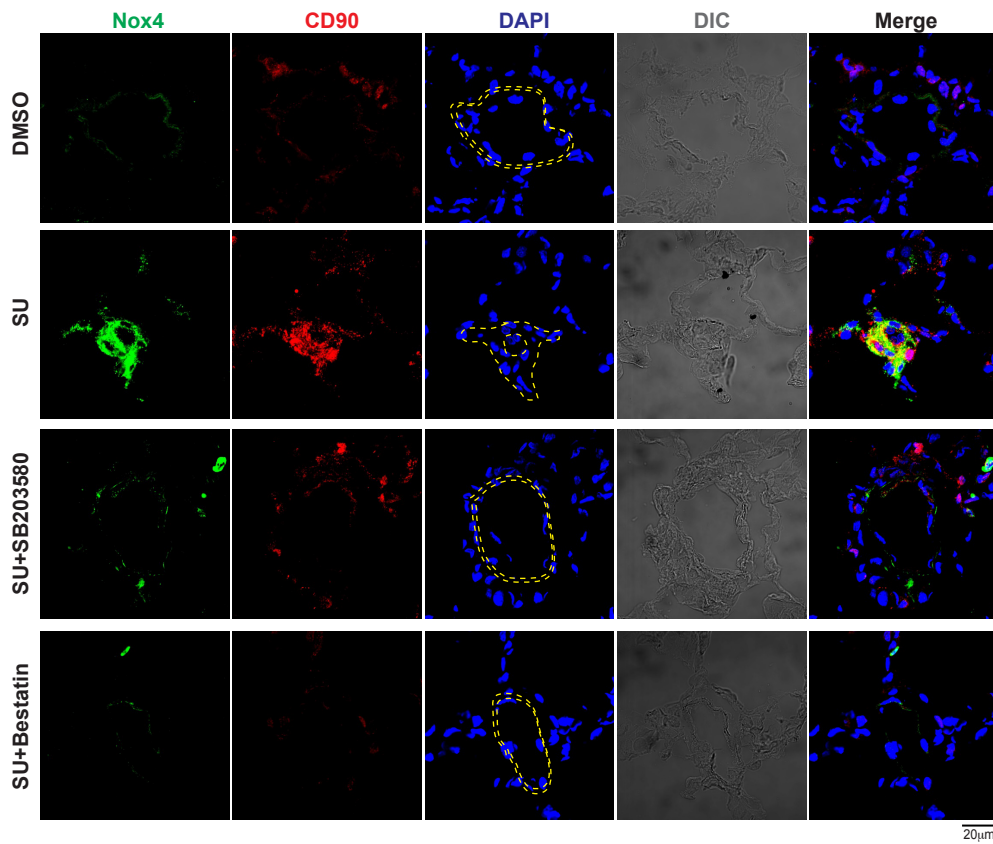

**Figure S5.** p38 MAPK inhibition therapy reduced Nox4 activation around the pulmonary vascular adventitia in experimental PH. Confocal images of rat lung tissues stained with Nox4 (green), CD90 (fibroblast, red) and 5-LO (magenta) from SB203580 treatment group; n=5. DAPI (blue) stains nuclei; DIC highlights alveolar and vascular structures.
